# Supplementary material for: MiRNA biomarkers and potential critical genes associated with the prognosis of gastric cancer
Source: Research Square preprint supplement (doi:10.21203/rs.3.rs-406855/v1), 2021-04-28
Supplement: Supplementary file 1 [file 910f0b2f7c5f581553d7b0bf.docx]

**TABLE S1** 15 miRNAs in univariate Cox regression analysis

| id | HR | HR.95L | HR.95H | pvalue |
| --- | --- | --- | --- | --- |
| hsa-miR-139-5p | 1.221114013 | 1.007213297 | 1.480440576 | 0.042040951 |
| hsa-miR-30a-3p | 1.209554904 | 1.024251841 | 1.428382169 | 0.024935834 |
| hsa-miR-125a-5p | 1.400739866 | 1.067108583 | 1.838680901 | 0.015185909 |
| hsa-let-7e-3p | 1.379179012 | 1.112272974 | 1.710133025 | 0.003394024 |
| hsa-miR-135b-3p | 0.798753671 | 0.664534832 | 0.960081241 | 0.016666684 |
| hsa-miR-143-5p | 1.265345148 | 1.077007161 | 1.486618103 | 0.004207226 |
| hsa-miR-183-5p | 0.806424452 | 0.690492635 | 0.941820902 | 0.006589607 |
| hsa-miR-96-5p | 0.760979145 | 0.641510037 | 0.902697114 | 0.001719776 |
| hsa-miR-196b-3p | 0.647725132 | 0.467516973 | 0.897395968 | 0.009033932 |
| hsa-miR-7-5p | 0.80105764 | 0.694958916 | 0.923354357 | 0.002213446 |
| hsa-miR-99a-3p | 1.175306943 | 1.007096696 | 1.371612493 | 0.040393888 |
| hsa-miR-942-3p | 0.726996602 | 0.585963914 | 0.901973734 | 0.00376056 |
| hsa-miR-137-3p | 1.160262141 | 1.000060542 | 1.346126739 | 0.049906727 |
| hsa-miR-652-5p | 0.783952044 | 0.623341637 | 0.98594538 | 0.037436271 |
| hsa-miR-9-3p | 1.17030055 | 1.007532184 | 1.359364395 | 0.039573506 |
